# Supplementary material for: Mutations in the LRRK2 Roc-COR tandem domain link Parkinson's disease to Wnt signalling pathways
Source: PubMed Central journal article supplement — Hum Mol Genet. 2009 Jul 22;18(20):3955–68. doi: 10.1093/hmg/ddp337 (PMC2748899; doi:10.1093/hmg/ddp337), 2009-07-22
Supplement: ddp337_1.pdf [file ddp337_1.pdf]

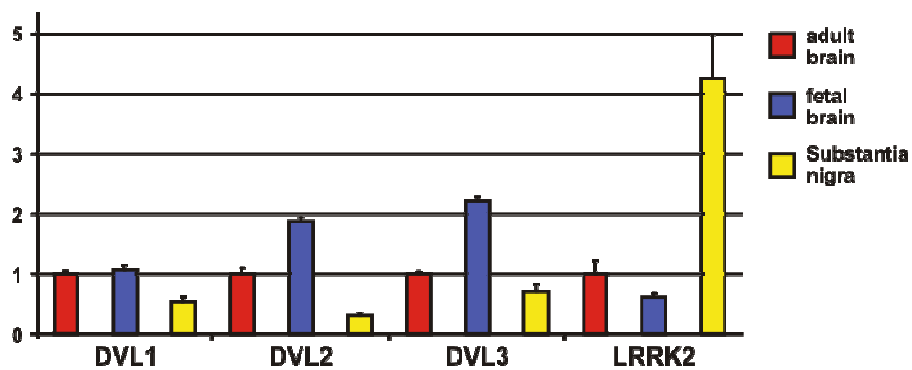

**Supplementary Figure S1.** A relative quantification (RQ) study of the expression of the DVL1, DVL2, DVL3 and LRRK2 genes in human foetal brain, adult brain and substantia nigra using the comparative method ( $\Delta\Delta\text{CT}$ ), TaqMan primer sets and an ABI 7500 real-time PCR system. Values were normalised to the expression of an endogenous control (human PPIA) within each tissue. Note that all members of the DVL family as well as LRRK2 can be detected in foetal brain, adult brain and substantia nigra, supporting a possible role for these proteins in the pathogenesis of PD.
